# Identification and in vivo role of the Armadillo-Legless interaction

Raymond Hoffmans and Konrad Basler\*

Institut für Molekularbiologie, Universität Zürich, Winterthurerstrasse 190, 8057 Zürich, Switzerland

\*Author for correspondence (e-mail: basler@molbio.unizh.ch)

Accepted 8 June 2004

Development 131, 4393–4400  
Published by The Company of Biologists 2004  
doi:10.1242/dev.01296

## Summary

The Wnt signalling system controls many fundamental processes during animal development and its deregulation has been causally linked to colorectal cancer. Transduction of Wnt signals entails the association of  $\beta$ -catenin with nuclear TCF DNA-binding factors and the subsequent activation of target genes. Using genetic assays in *Drosophila*, we have recently identified a presumptive adaptor protein, Legless (Lgs), that binds to  $\beta$ -catenin and mediates signalling activity by recruiting the transcriptional activator Pygopus (Pygo). Here, we characterize the  $\beta$ -catenin/Lgs interaction and show: (1) that it is critically dependent on two acidic amino acid residues in the first Armadillo repeat of  $\beta$ -catenin; (2) that it is spatially and functionally separable from the binding

sites for TCF factors, APC and E-cadherin; (3) that it is required in endogenous as well as constitutively active forms of  $\beta$ -catenin for Wingless signalling output in *Drosophila*; and (4) that in its absence animals develop with the same phenotypic consequences as animals lacking Lgs altogether. Based on these findings, and because Lgs and Pygo have human homologues that can substitute for their *Drosophila* counterparts, we infer that the  $\beta$ -catenin/Lgs binding site may thus serve as an attractive drug target for therapeutic intervention in  $\beta$ -catenin-dependent cancer progression.

Key words: *Drosophila*, Disease, Colorectal cancer, Wnt signalling,  $\beta$ -catenin

## Introduction

Colorectal cancer is the second leading cause of cancer incidence and cancer death among adults in Europe. It is estimated for the year 2000 alone that 362,620 people were diagnosed with colorectal cancer, and 198,778 patients died owing to this disease (Ferlay et al., 2001). In more than 80% of the sporadic colorectal cancers, both alleles of the Adenomatous Polyposis Coli (APC) gene are inactivated (Kinzler and Vogelstein, 1996). The APC protein forms – together with Axin and GSK3 $\beta$  – a degradation complex for  $\beta$ -catenin. In this complex, GSK3 $\beta$  phosphorylates  $\beta$ -catenin, which in turn is ubiquitinated and thereby targeted for destruction. Wnt signalling inhibits the degradation complex and hence leads to the cytoplasmic accumulation and entry of  $\beta$ -catenin into the nucleus, where it forms a complex with members of the Pangolin (Pan)/TCF/Lef family of DNA-binding proteins, the putative adaptor protein Legless/BCL9 (Lgs) and the transcriptional regulator Pygopus (Pygo) (Behrens et al., 1996; Belenkaya et al., 2002; Brunner et al., 1997; Kramps et al., 2002; Parker et al., 2002; Riese et al., 1997; Thompson et al., 2002; van de Wetering et al., 1997). Loss of APC also causes an increase in  $\beta$ -catenin levels and thus leads to a constitutive activation of this pathway. The nuclear  $\beta$ -catenin complex activates transcription of known proto-oncogenes such as *Myc* and *cyclin D1* (He et al., 1998; Shutterman et al., 1999). Preventing the formation of the TCF/ $\beta$ -catenin/Lgs/Pygo complex should halt the expression of these genes and thus alleviate the detrimental effects caused by the loss of the APC tumour suppressor. Indeed, overexpression of a dominant-negative form of TCF4 in colorectal cancer cells results in G1 cell cycle arrest (van de Wetering et al., 2002). Furthermore, reduction of human Pygo expression by means of RNA interference in colorectal

cancer cells reduces the transcriptional output induced by the nuclear  $\beta$ -catenin complex (Thompson et al., 2002).

Here, we set out to characterize the interaction of  $\beta$ -catenin and Lgs. We report the identification of two amino acids of  $\beta$ -catenin that play an essential role in Lgs binding. This presumed binding site is specific for Lgs and is not required for APC, E-cadherin or TCF4. We show that Armadillo (Arm), the *Drosophila* homologue of  $\beta$ -catenin, depends on these amino acid residues for mediating Wnt/Wg signalling in vivo, but not for establishing functional adherens junctions. Together, our results indicate that the  $\beta$ -catenin/Lgs interaction may provide an attractive target for therapeutic intervention.

## Materials and methods

### $\beta$ -catenin and Arm mutants

The crystal structure of  $\beta$ -catenin (Protein Data Bank accession code 2BCT) was used in conjunction with the PDB viewer (<http://au.expasy.org/spdbv>) to select amino acid residues of  $\beta$ -catenin that are exposed and have more than 30% accessibility. Twenty-five human  $\beta$ -catenin mutants (in pGAD424) were obtained from von Kries et al. (von Kries et al., 2000). These constructs comprised only Arm repeats 3–12 and the C terminus, and were extended with Arm repeat 1 and 2, such that all final constructs extended from amino acids 129 to 781. Another 14-point mutations were introduced in repeats 1–3 by site-directed mutagenesis (Quickchange-Kit, Stratagene). Human LGS1 (amino acids 199–392), human TCF4 (amino acids 1–130), mouse Apc (amino acids 1152–1393), mouse E-cadherin (amino acids 773–885) and mouse  $\alpha$ -catenin (amino acids 1–750) were cloned into pBTM116 (Bartel and Fields, 1997). For interactions with  $\alpha$ -catenin the mutations were brought into the context of full length  $\beta$ -catenin constructs. All constructs were verified by sequencing.

A subset of the  $\beta$ -catenin mutations were also introduced into Arm.

For simplicity, we use the amino acid numbering of  $\beta$ -catenin for both  $\beta$ -catenin and Arm throughout the text.  $\beta$ -Catenin D162, E163, D164 and K435 would correspond to Arm D170, E171, D172 and K443.

### Yeast two-hybrid assays

The yeast two-hybrid system as described previously (Bartel and Fields, 1997) was used. Interactions between proteins were measured using the quantitative 'Liquid Culture Assay Using ONPG as Substrate' (Clontech, 2001).

### Transgenes

For embryonic experiments *arm* transgenes were expressed from UAS-constructs under control of the *daughterless-Gal4* driver (Wodarz et al., 1995). Three independent lines were established and tested for the *arm<sup>S10</sup>-wt*, *arm<sup>S10</sup>-D164A* and *arm<sup>S10</sup>-K435E* constructs, and two independent lines for  *$\Delta$ arm-wt*,  *$\Delta$ arm-D164A* and  *$\Delta$ arm-K435E*; in all cases, different integrations of the same construct yielded similar effects. For rescue experiments full-length *arm* transgenes were driven by the *tubulin $\alpha$ 1* (*tub*) promoter (Basler and Struhl, 1994). All *arm*-coding regions used contain a *Myc* epitope in their C-terminal region at the same position as the *arm<sup>S10</sup>* construct used by Pai et al. (Pai et al., 1997).

### Germline clones

To obtain *arm* germline clones, second and third instar larvae generated from a cross between *arm<sup>2a9</sup> FRT101/FM7; tub-arm[-wt or -D164A]/+* virgins with *ovo<sup>D1</sup> FRT101/Y; hs-flp[F38]/hs-flp[F38]* were heat-shocked at 38°C for 1.5 hours. After hatching, the fertile females will produce only progeny from *arm<sup>2a9</sup>* mutant germlines. Females bearing the *tub-arm-wt* transgene were crossed to *y w* males and laid embryos that all contain maternal *tub-arm-wt* product (otherwise no eggs would be generated). Only 25% of these embryos will inherit neither the rescuing transgene nor the paternal *arm<sup>+</sup>* allele, and these embryos resemble zygotic *arm<sup>2a9</sup>* embryos. The observed number for such embryos was 90 out of 385. Females that were *arm<sup>2a9</sup>/arm<sup>2a9</sup>; tub-arm-D164A/+* were crossed with *y w* males and laid embryos that all contain maternal *tub-arm-D164A* product (otherwise no eggs would be generated). Three classes of embryos are expected (50% class I, 25% class II, 25% class III): while all embryos are maternally mutant for *arm<sup>2a9</sup>*, 50% of them (class I) are zygotically *arm<sup>+</sup>*, and hence rescued (from the paternal X chromosome), and the other 50% (classes II and III) are also zygotically mutant for *arm<sup>2a9</sup>*. Half of these (class II), however, inherit the *tub-arm-D164A* transgene, and show a slightly weaker segment polarity phenotype (Fig. 5C) compared with the other half (class III) that does not (Fig. 5D). The observed numbers for these three classes were 33, 12 and 14, respectively. For the generation of *lgs* germline clones see Kramps et al. (Kramps et al., 2002).

### Disc clones

Mutant imaginal disc clones were generated by crossing *arm<sup>2a9</sup> FRT18/FM7* females with *hs-flp hs-GFP FRT18; tub-arm[-wt or -D164A]/TM6b*. Ninety-six hours after egg laying, larvae were heat shocked at 38°C for 1 hour. Female larvae that did not carry *TM6b* were dissected 48 hours after the heat shock. Imaginal discs were fixed and stained by standard techniques. Antibodies used were mouse monoclonal anti-Dll (gift from I. Duncan), rat monoclonal anti-dE-cadherin (DCAD2, gift from T. Uemura) and rabbit polyclonal anti-Lgs (Kramps et al., 2002).

## Results

### Identification and characterization of the Lgs binding site of $\beta$ -catenin

The primary structure of  $\beta$ -catenin consists of acidic N and C termini, and a highly basic central region containing 12

imperfect sequence repeats that are known as Armadillo repeats (Arm repeats). These repeats pack against each other to form a continuous superhelix, which features a positively charged groove (Huber et al., 1997). The Arm repeat domain provides binding sites for APC, Axin, E-cadherin, TCF4 and human LGS1 (Fig. 1A). Despite lack of significant sequence homology, APC, E-cadherin and TCF4 are known to bind competitively to  $\beta$ -catenin (Hulsken et al., 1994; Omer et al., 1999). Structural studies have shown that APC, E-cadherin and TCF4 bind to largely overlapping regions of the positively charged groove of  $\beta$ -catenin (Eklof Spink et al., 2001; Graham et al., 2000; Graham et al., 2001; Huber and Weis, 2001; Xing et al., 2003). Lgs instead requires the first four Arm repeats for binding to Arm (Kramps et al., 2002). We set out to map and characterize the human LGS1- $\beta$ -catenin interaction by performing an alanine mutagenesis scan.

A set of 39  $\beta$ -catenin mutants containing substitutions of single, exposed amino acid residues (mostly with basic and aromatic side chains, Fig. 1C,D) was tested for the ability to bind human LGS1 in a yeast two-hybrid system (see Materials and methods). Two of these mutants showed a reproducible reduction in binding: the D162A mutation reduced binding by fourfold compared with wild-type  $\beta$ -catenin and D164A even by 25-fold. In the initial screen, R386A also showed a reduced binding to human LGS1 (two-fold, Fig. 1E), but this reduction was variable (Fig. 1F) and is not considered to be significant.

In addition to its role in Wnt signalling,  $\beta$ -catenin is also a component of the cadherin-based cell adhesion system, linking the transmembrane protein E-cadherin to  $\alpha$ -catenin, thereby connecting adherens junctions to the cytoskeleton (reviewed by Pokutta and Weis, 2002).  $\beta$ -Catenin is also part of its own degradation complex consisting of APC, Axin and GSK3 $\beta$ . In order to evaluate the specificity of the mutations that disrupt  $\beta$ -catenin/human LGS1 binding, mutations D162A and D164A were tested for their effect on the interactions between  $\beta$ -catenin and APC, E-cadherin, TCF4 and  $\alpha$ -catenin. As a control, we also included in this analysis E163A, which had virtually no effect on the  $\beta$ -catenin/human LGS1 interaction even though it also reduces the negative charge at this region of the protein. None of the three mutations affected the binding of  $\beta$ -catenin to APC, E-cadherin or TCF4. Binding to  $\alpha$ -catenin, however, was reduced approximately twofold by D162A and D164A (Fig. 1F). This was unexpected, as the region comprising amino acids 120-151 of  $\beta$ -catenin has been shown to be necessary and sufficient for binding to  $\alpha$ -catenin (Aberle et al., 1994). Amino acids D162, E163 and D164 form an acidic knob in repeat 1 of  $\beta$ -catenin (Fig. 1B, white arrow), on the side opposite to the basic groove. From these results we conclude: (1) that  $\beta$ -catenin binds human LGS1 and APC/E-cadherin/TCF4 on opposite sides; and (2) that the binding to human LGS1 but not to APC/E-cadherin/TCF4 is disrupted by the mutations D162A and D164A.

### Arm-D164A fails to rescue *armadillo* null mutant animals

Armadillo (Arm) is the *Drosophila* homologue of  $\beta$ -catenin. The two proteins show high sequence similarity, especially in the Arm repeat region (Peifer and Wieschaus, 1990; Peifer et al., 1994). To investigate whether a mutant form of Arm, which can no longer bind Lgs, has impaired transcriptional activity in *Drosophila*, we first analyzed whether  $\beta$ -catenin and Arm use

**Fig. 1.** Identification of mutations in  $\beta$ -catenin that affect Lgs binding. (A) Schematic representation of the  $\beta$ -catenin protein. The Arm repeats are marked by different colours and numbered 1-12. Black lines represent the binding domains of  $\beta$ -catenin interaction partners. P marks the phosphorylation sites used by the degradation complex. The red line indicates the protein product of the *arm<sup>2a9</sup>* allele, which contains an X-ray induced frame shift in Arm repeat 3 and results at best in a truncated protein. (B) Electrostatic surface of  $\beta$ -catenin. Blue and red surfaces represent regions of positive (basic) and negative (acidic) potential, respectively. White arrow indicates the acidic knob that is essential for Lgs binding (amino acids 162 to 164). The broken line indicates the basic groove in which E-cadherin, TCF4 and APC make multiple contacts with  $\beta$ -catenin (reviewed by Daniels et al., 2001). (C,D) Space filling models of Arm repeats 1-12. The mutations are indicated in the colour of the Arm repeat that contains the mutation (same colour scheme as in A). The model in D is turned by 90° along the horizontal axis compared with that in C. (E) Interaction of mutant  $\beta$ -catenin proteins with human LGS1 tested by yeast two-hybrid analysis. Mutations D162A, D164A and R386A show an effect on Lgs binding. Bars are colour-coded to match the colour scheme of the Arm repeats in A. The protein Hucklebein (Hkb) served as a negative control, as it is a transcription factor (Bronner et al., 1994) that plays no role in Wnt/Wg signalling. (F) A subset of the  $\beta$ -catenin mutants was tested for binding to APC, E-cadherin, TCF4 and  $\alpha$ -catenin. D162A and D164A do not have a negative effect on binding of  $\beta$ -catenin to APC, E-cadherin and TCF4. The mutations that affected Lgs binding also reduced  $\alpha$ -catenin binding by 50%. R386A affected Lgs binding to variable degree (compare E with F), but led to a reproducible reduction in the binding to APC, E-cadherin and TCF. Results are presented as the percentage of binding compared with wild-type  $\beta$ -catenin.

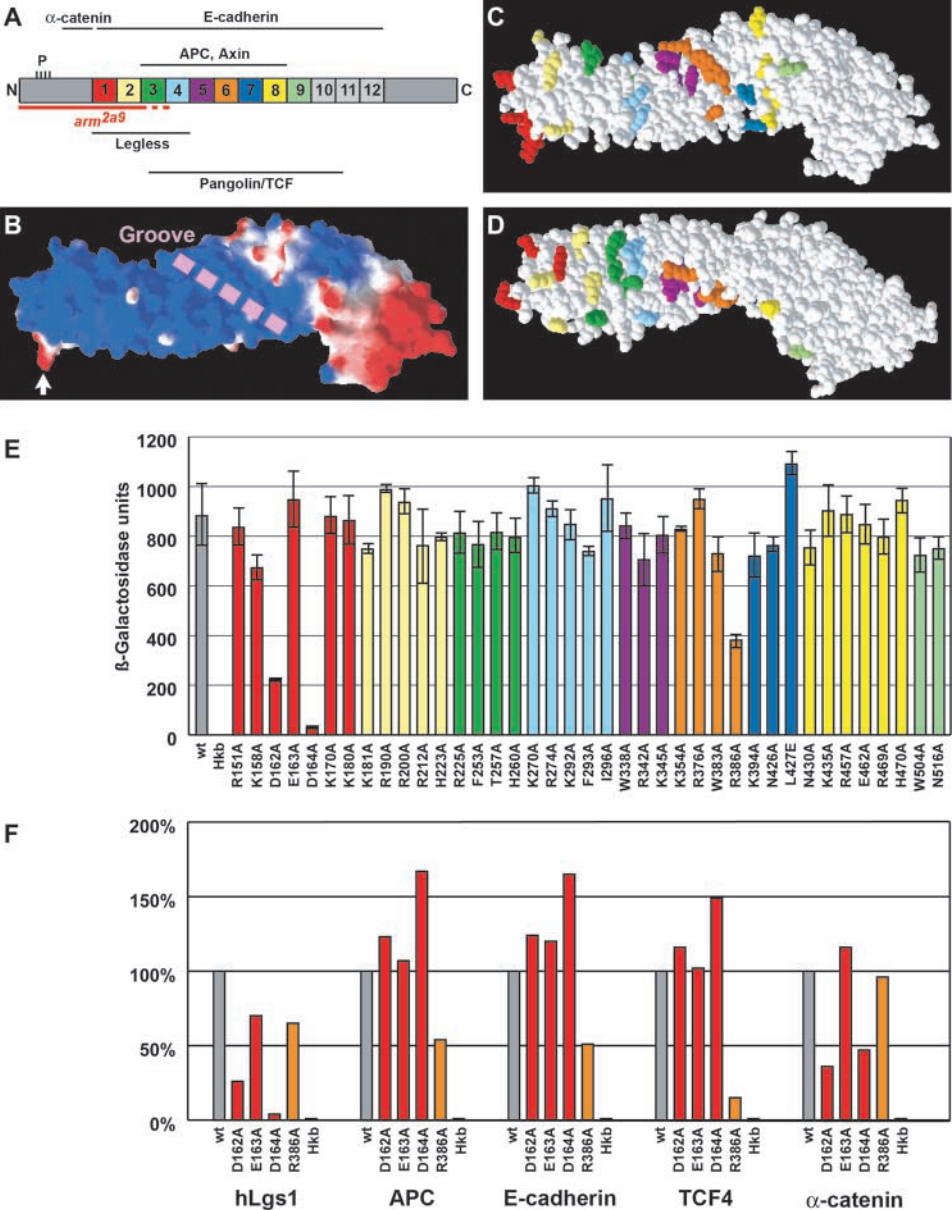

equivalent sites for binding human and *Drosophila* Lgs. The D164A mutation – and as a negative control the E163A mutation – were introduced into Arm and found to affect the Arm/Lgs interaction to the same extent as the corresponding mutations in  $\beta$ -catenin (not shown). We then tested whether Arm-D164A can substitute for the wild-type form of Arm in vivo by performing a rescue assay with the *arm<sup>2a9</sup>* allele, which has a frameshift mutation in Arm repeat 3 (Fig. 1A) and is the strongest *arm* allele known. Hemizygous *arm<sup>2a9</sup>* males die as embryos but can be rescued by *tubulin $\alpha$ 1*-promoter-driven *arm-wt* or *arm-E163A* transgenes to adulthood with no obvious phenotypes (Table 1). By contrast, *arm<sup>2a9</sup>* males die as embryos or early larvae when these transgenes contain the D164A mutation or K435E, which affects TCF/Pan binding (Graham et al., 2000). We interpret these results to indicate that

the wild-type function of Arm depends crucially on its ability to bind Lgs and Pan.

### Constitutive signalling activity of Arm<sup>S10</sup> depends on D164

Mutations in the N terminus of  $\beta$ -catenin that impede its phosphorylation and subsequent degradation cause – like loss of APC or Axin – constitutive activation of the Wnt/Wg pathway and are found in 10% of sporadic colorectal cancers (Sparks et al., 1998; Korinek et al., 1997; Morin et al., 1997). In *Drosophila*, embryonic overexpression of N-terminally truncated forms of Arm mimics this situation and leads to a naked cuticle phenotype, owing to overactivation of the pathway. Arm<sup>S10</sup> is one such form, owing to an in-frame deletion that removes the GSK3 $\beta$  phosphorylation sites but



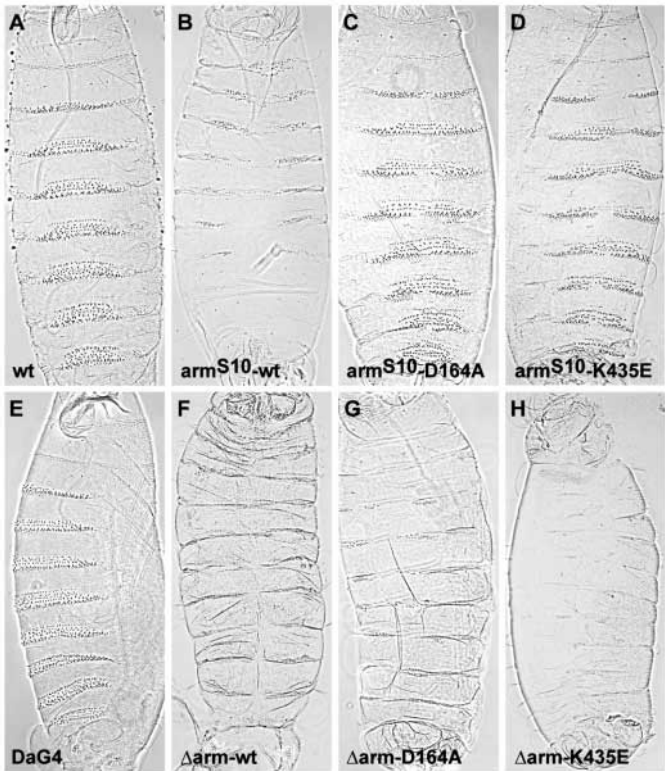

**Fig. 2.** Constitutively active forms of Arm depend on Lgs binding for signalling activity. (A) The cuticle of a wild-type (wt) embryo. (B) Ubiquitous expression of a constitutively active form of Arm ( $\text{Arm}^{\text{S10-wt}}$ ) results in a naked cuticle phenotype. (C,D) Ubiquitous expression of  $\text{Arm}^{\text{S10}}$  carrying the D164A or the K435E mutations to impair the binding to Lgs or Pan, respectively, no longer causes a naked cuticle phenotype. Occasional ectopic denticles in areas where Wg is active (and which are normally naked) can be observed and indicate that these two mutant forms may exhibit slight dominant-negative activities, possibly by titrating away Pan and Lgs, respectively, from wild-type Arm. (E) The cuticle of an embryo containing the *daughterless-Gal4* (DaG4) driver is indistinguishable from that of wild-type embryos (A). (F-H) Ubiquitous expression of a constitutively active, membrane-targeted form of Arm ( $\Delta\text{Arm-wt}$ ) results in a naked cuticle. Mutations in  $\Delta\text{Arm}$  that affect binding to Lgs ( $\Delta\text{Arm-D164A}$ ) or Pan ( $\Delta\text{Arm-K435E}$ ) still result in a naked cuticle phenotype, most probably because in this situation endogenous Arm, and not membrane-targeted Arm, mediates the signalling output (Tolwinski and Wieschaus, 2001; Tolwinski and Wieschaus, 2004). All transgenes in these experiments were controlled by UAS-promoters driven by DaG4 (Wodarz et al., 1995).

leaves  $\alpha$ -catenin binding intact (Pai et al., 1997). Ubiquitous expression of  $\text{Arm}^{\text{S10}}$  (from a transgene driven by *daughterless-Gal4*) results in naked cuticle (Fig. 2B). However, overexpression of  $\text{Arm}^{\text{S10-D164A}}$  results in an almost wild-type cuticle (Fig. 2C). We interpret the correlation between the failure to suppress denticle formation and the failure to bind Lgs to indicate that  $\text{Arm}^{\text{S10}}$  largely depends on Lgs binding for its biological activity. As a control, we also overexpressed a form of  $\text{Arm}^{\text{S10}}$  that is affected in Pan binding ( $\text{Arm}^{\text{S10-K435E}}$ ); the K435E mutation also efficiently reverts the gain-of-function activity of  $\text{Arm}^{\text{S10}}$  (Fig. 2D). Thus, the constitutive activity of  $\text{Arm}^{\text{S10}}$  depends on the binding of both Lgs and Pan.

Another stable and thus constitutively active form of Arm is  $\Delta\text{Arm}$ , in which a large N-terminal region comprising the GSK3 $\beta$  phosphorylation and  $\alpha$ -catenin-binding sites is replaced by a myristoylation signal (Zecca et al., 1996). Its biological activity depends on the presence of wild-type cellular Arm (Tolwinski and Wieschaus, 2001; Tolwinski and Wieschaus, 2004). It has been shown that expression of membrane-tethered forms of  $\beta$ -catenin leads to the nuclear localization of endogenous  $\beta$ -catenin (Miller and Moon, 1997). If  $\Delta\text{Arm}$  signalling is mediated by wild-type cellular Arm, then disrupting the binding to Lgs or Pan should not affect its ability to activate the Wg pathway. Indeed, we find that overexpression of  $\Delta\text{Arm-wt}$ ,  $\Delta\text{Arm-D164A}$  and  $\Delta\text{Arm-K435E}$  all resulted in a completely naked cuticle phenotype (Fig. 2F-H), suggesting that  $\Delta\text{Arm}$  signals via cellular Arm, which is wild-type and hence able to recruit Lgs.

**Reduced expression levels of Wg targets in *arm-D164A* cells**

To assess the role of the D164 site in the transcriptional function of Arm, we analyzed Wg target gene expression in

*arm* mutant clones in third instar wing imaginal discs. There Wg is expressed at the dorsoventral boundary in a narrow stripe of cells and regulates the expression of a number of genes, among them *Distalless* (Dll), which is expressed in a broad band of cells on both sides of the wing margin (Diaz-Benjumea and Cohen, 1995; Zecca et al., 1996). We used the strong *arm* allele *arm<sup>2a9</sup>* to induce mutant clones in the second larval instar. Dll expression was lost in these clones 48 hours later (Fig. 3B). Ubiquitous expression of the *tubulin $\alpha$ -arm-wt* transgene fully restored Dll expression in such clones (Fig. 3C). By contrast, *arm<sup>2a9</sup>* clones showed severely reduced Dll expression when the *tubulin $\alpha$ -arm-D164A* transgene was used (Fig. 3D). Thus, Arm-D164A is severely impaired in transducing the Wg signal, suggesting that Arm needs to bind Lgs to efficiently upregulate Dll expression in response to larval Wg.

To exclude the possibility that *arm* mutant cells unspecifically shut down gene expression, we analyzed the protein levels of Lgs in *arm* clones. Lgs is a nuclear protein and its levels are not regulated by Wg signalling (Kramps et al., 2002). As shown in Fig. 3A, *arm<sup>2a9</sup>* clones express Lgs to the same extent as wild-type cells. This control experiment

**Table 1. Rescue ability of the *arm* transgene**

| Transgene            | Rescue (%) | n   |
|----------------------|------------|-----|
| None                 | 0          | 150 |
| <i>tub-arm-wt</i>    | 96         | 166 |
| <i>tub-arm-E163A</i> | 62         | 81  |
| <i>tub-arm-D164A</i> | 0          | 133 |
| <i>tub-arm-K435E</i> | 0          | 66  |

D164 is required for Arm function. Females heterozygous for *arm<sup>2a9</sup>* were crossed with males containing different *tubulin $\alpha$* -promoter-driven rescue constructs. The percentages of rescued males containing both the *arm<sup>2a9</sup>* allele and the *tubulin $\alpha$* -rescue constructs are shown. n indicates the male progeny that contain the *tubulin $\alpha$* -rescue construct but inherited the wild-type *arm* allele from the balancer chromosome instead of the *arm<sup>2a9</sup>* allele and therefore corresponds to the expected number of *arm<sup>2a9</sup>* males with the *tubulin $\alpha$* -rescue construct.

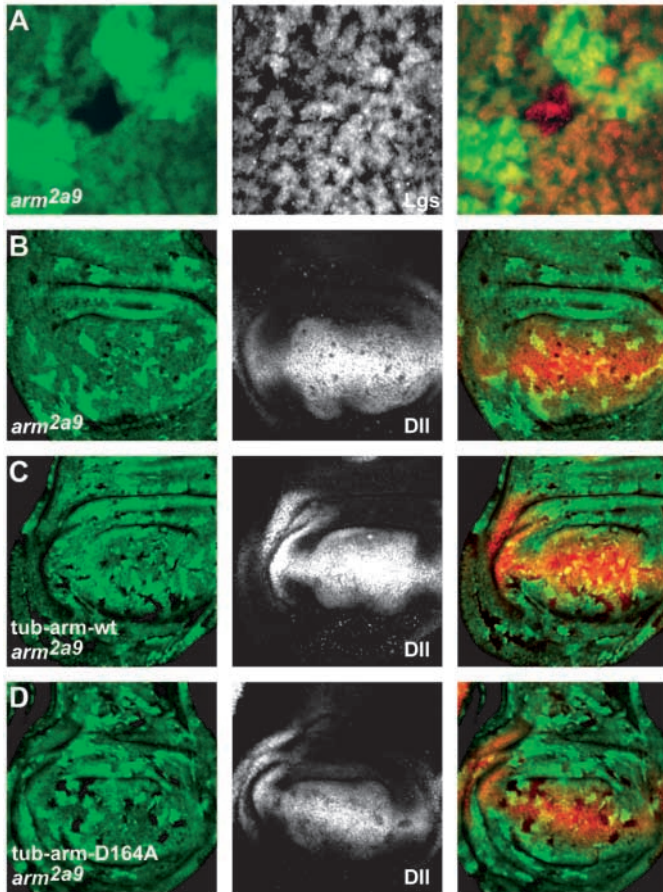

**Fig. 3.** Arm-D164A fails to restore wild-type levels of Dll expression in *arm*-null clones. Confocal sections of wing discs are shown, stained for either Lgs or Dll expression. Loss of GFP (green) marks clones lacking Arm (left panels). Merged images are shown towards the right. (A) *arm*<sup>2a9</sup> clones express Lgs, indicating that these cells are still viable and capable of expressing proteins. Not only the overall levels, but also the subcellular distribution of Lgs is unaffected by the loss of Arm. The magnification in this panel is sixfold higher than those in B-D. (B) *arm*<sup>2a9</sup> clones do not express Dll. (C) Ubiquitous expression of Arm-wt rescues Dll expression in *arm*<sup>2a9</sup> clones. (D) Ubiquitous expression of Arm-D164A has only weak rescuing activity and most *arm*<sup>2a9</sup> clones exhibit severely reduced levels of Dll expression.

adherens junctions, and hence is able to sufficiently tether E-cadherin and  $\alpha$ -catenin.

### Replacement of maternal and zygotic Arm by Arm-D164A is equivalent to lack of Lgs function

Although both the failure to rescue zygotically mutant animals and the failure to rescue gene expression in *arm* mutant disc cells indicate a requirement for the D164 site and hence the Arm/Lgs interaction, neither of these assays provides the means to compare the reduction of Wg transduction to that caused by the genetic removal of Lgs. Additionally both assays may be influenced by the perdurance of wild-type *arm* product. The most stringent test for the role of D164 in Wg signalling is the creation of embryos in which both the maternal and the zygotic contribution of wild-type *arm* product are replaced by Arm-D164A. To achieve this situation, we generated germline clones using the *arm*<sup>2a9</sup> allele. Such germline clones fail to produce eggs because of junctional defects (Peifer et al., 1993). However, *arm*<sup>2a9</sup> germline clones do give rise to eggs and phenotypically normal larvae in the maternal and zygotic presence of a *tubulin $\alpha$ 1-arm-wt* transgene (not shown). When only maternal *arm-wt* product is contributed, eggs are laid from mutant germline clones and the resulting embryos resemble zygotic *arm*<sup>2a9</sup> embryos. Eggs were also laid from clones expressing the *tubulin $\alpha$ 1-arm-D164A* transgene, corroborating our conclusion that Arm-D164A protein can restore functional adherens junctions (Fig. 5C,D). Embryos whose sole source of Arm, both maternally and zygotically, was the *tubulin $\alpha$ 1-arm-D164A* transgene (Fig. 5C) died with a segment polarity phenotype characterized by an excess of ventral denticles at the expense of naked cuticle. This phenotype, which is weaker than that of *wg* null mutants (Nüsslein-Volhard et al., 1984; Bejsovec and Wieschaus, 1993), closely resembles the phenotype of embryos devoid of maternal and zygotic *lgs* function (Fig. 5B). Because the *arm-D164A* phenotype is not notably weaker than that of *lgs* embryos, we conclude that the D164A mutation effectively eliminates in vivo – as in the yeast assay – most or all Lgs function. Moreover, as we failed to observe any phenotypes of *arm-D164A* embryos that surpassed those of *lgs* embryos, we also conclude that the D164 site is unlikely to serve any critical function other than recruitment of Lgs.

### Discussion

The Wnt signalling pathway not only controls a multitude of fundamental patterning processes during animal development (reviewed by Wodarz and Nusse, 1998), its deregulation is also

indicates that the loss or reduction of Dll expression in *arm* null and *arm-D164A* clones is due to the inability of these cells to respond efficiently to Wg rather than due to a general effect caused by cellular decay. It further rules out the possibility that the nuclei of mutant cells have escaped the apicobasal plane at which target gene expression was optically recorded.

### Arm-D164A can restore adherens junctions of *arm* mutant cells

We noticed that *arm*<sup>2a9</sup> clones are not only smaller than their twin-spots but that their shape is round compared with the irregular outline of normal clones (Fig. 3B). On the contrary, *arm* clones that express *arm-wt* or *arm-D164A* transgenes are similar in size to their twin-spots and have an irregular shape (Fig. 3C,D). These differences hint at an adherens junction defect of *arm* null mutant cells, as  $\beta$ -catenin is required at these sites to link E-cadherin and  $\alpha$ -catenin, and cells with defective adherens junctions or different E-cadherin levels sort out from neighbouring cells (Dahmann and Basler, 2000; Uemura et al., 1996). In order to visualize adherens junctions we stained wing discs with an antibody directed against *Drosophila* E-cadherin (Uemura et al., 1996). Indeed, E-cadherin distribution is diffuse in *arm* null clones (Fig. 4A). As *arm-wt* and *arm-D164A* transgenes rescue the abnormal distribution of E-cadherin in *arm* cells (Fig. 4B,C), and no longer cause aggregation into non-intermingling cell groups, their products appear to restore the function of adherens junction. This suggests that Arm-D164A can confer  $\beta$ -catenin function at



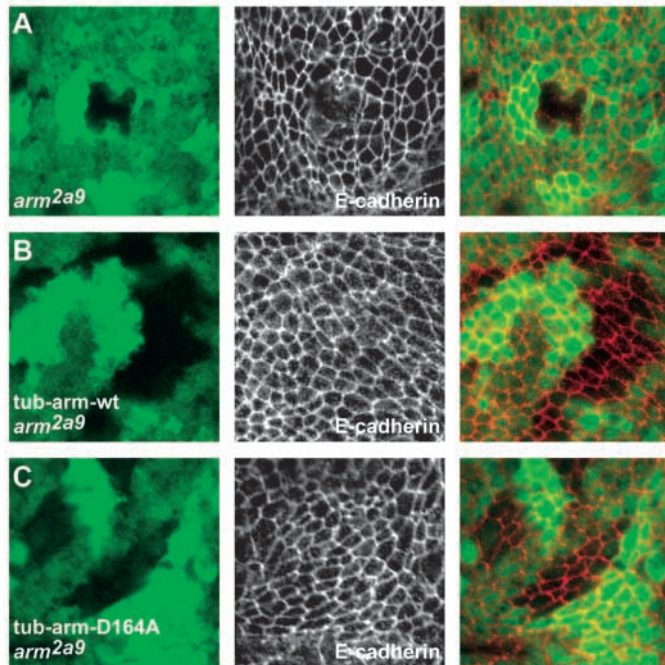

**Fig. 4.** Arm-D164A can restore functional adherens junctions in *arm* clones. Confocal sections of wing disc cells are shown, stained for E-cadherin expression (central panels) marking the adherens junctions. Loss of GFP (green) marks clones lacking Arm (left panels). Merged images are shown to the right. (A) *arm<sup>2a9</sup>* clones are small, have an abnormally round shape, and show diffuse E-cadherin staining. (B) *arm<sup>2a9</sup>* clones expressing Arm-wt exhibit the typical irregular outline of wild-type clones in wing discs and show restored E-cadherin staining. (C) *arm<sup>2a9</sup>* clones expressing Arm-D164A behave like those expressing Arm-wt; they exhibit irregular outlines and restored E-cadherin staining.

responsible for an increasing number of cancers. Hence, major efforts strive towards the identification of all protein components involved in this pathway and also for the detailed characterization of their molecular interactions. We have recently identified two novel genes involved in the transduction of the Wg signal, *lgs* and *pygo*, and found that their products serve as adaptor proteins to convert nuclear  $\beta$ -catenin/Arm activity into transcriptional activation of target genes (Kramps et al., 2002). Here, we are concerned with the question of how  $\beta$ -catenin and Lgs interact molecularly with each other. Our analysis addressed three issues: localization of the binding site on  $\beta$ -catenin, specificity of this site vis-à-vis other partners of  $\beta$ -catenin and in vivo significance of this interaction for Wg signal transduction.

### Binding site

By means of site-directed mutagenesis we assayed the role of conspicuous  $\beta$ -catenin residues in the binding to human LGS1. Two amino acids, D162 and D164, were identified that are both necessary for human LGS1 binding. Because substitutions of

these residues with other amino acids did not affect the binding of several other proteins to  $\beta$ -catenin, we interpret their role as contact sites for human LGS1, rather than a structural function enhancing stability and/or three-dimensional conformation of  $\beta$ -catenin. This conclusion, however, will need to be confirmed by determining the crystal structure of the  $\beta$ -catenin/human LGS1 complex.

### Specificity

We showed that neither D162 nor D164 is required for binding to APC, E-cadherin or TCF4. Substitutions of these amino acids did reduce binding to  $\alpha$ -catenin twofold, but our in vivo data suggest that this reduction does not prevent the assembly of adherens junctions. The specificity of the  $\beta$ -catenin/human LGS1 interaction vis-à-vis that of  $\beta$ -catenin and APC, E-cadherin or TCF4 is consistent with their respective locations on the surface of  $\beta$ -catenin. While crystallographic studies showed that APC, E-cadherin and TCF4 all bind to a common, extended surface within the groove of  $\beta$ -catenin formed by Arm repeats 3-10 (reviewed by Daniels et al., 2001), our analysis indicates that human LGS1 binds an acidic knob in Arm repeat 1. This knob is not only located more N terminally, it is also situated on the side of  $\beta$ -catenin, which is opposite to the groove (Fig. 1B). The spatial separation of these binding sites is in agreement with their separable functions observed in our yeast binding assays, as well as with previous GST pull-down assays, in which we observed simultaneous binding of TCF4 and human LGS1 to  $\beta$ -catenin (Kramps et al., 2002).

### In vivo significance

To assess the role of D162 and D164 in Wg transduction, we

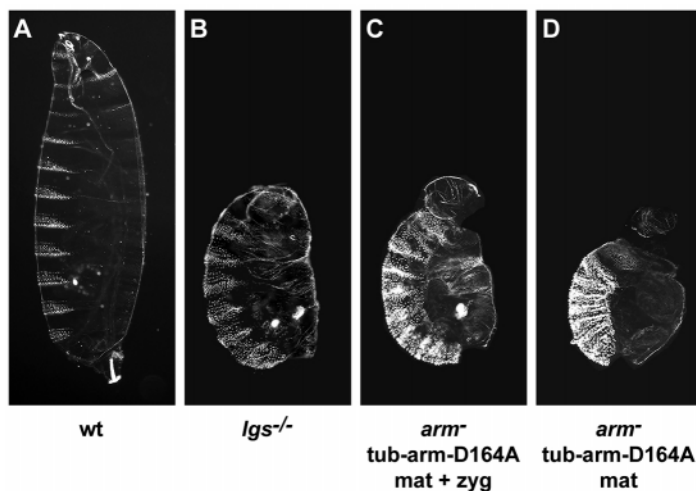

**Fig. 5.** *arm-D164A* animals closely resemble *lgs* mutants. (A) The cuticle of a wild-type (wt) embryo shown in dark-field. (B) Embryo maternally and zygotically mutant for *lgs<sup>20F</sup>*. This allele carries a premature stop codon and is hence considered a null allele (Kramps et al., 2002). (C) Embryo representing class II (see Materials and methods), derived from an *arm<sup>2a9</sup>* germline clone with maternal (mat) and zygotic (zyg) Arm-D164A function. Such embryos display a lawn of denticles similar to that of embryos that are maternally and zygotically mutant for the *lgs* null allele (B). (D) Embryo representing class III (see Materials and methods), derived from an *arm<sup>2a9</sup>* germline clone with only maternal (mat) Arm-D164A function. Such embryos display a phenotype which is more severe than that of class II and *lgs* null embryos. Note that the reduced contrast in the denticle patterns of the embryos shown in A and B versus those in C and D stems from the marker gene *yellow*, which, for technical reasons (Kramps et al. 2002), is mutant in embryos A and B, but wild type in C and D.

subjected mutant forms of Arm to various assays designed to reveal their *in vivo* function. Simple rescue and overexpression experiments showed that transgenic Arm-D164A cannot substitute for endogenous Arm, and that the D164A mutation significantly reduces the constitutive signalling activity associated with N-terminal deletions of Arm. When tested in more advanced assays, we find that D164 is required by wing disc cells to maintain Wg target gene expression and by developing embryos for segmentation. Together, these experiments support the conclusion that Arm signalling function relies on its capability to bind to Lgs throughout development.

Although it is straightforward to interpret our results as a qualitative indication for the significance of the Arm/Lgs interaction, it is more difficult to assess their outcome in a quantitative manner. For example, the apparent residual expression of Dll in Arm-D164A cells may reflect perdurance of wild-type Arm or Dll proteins, but it could also indicate that a fraction of the Wg signal can be transmitted despite the D164A mutation. This latter scenario could in turn be attributed to some residual binding of Arm to Lgs, but it could also be explained by a partial redundancy of Lgs function. Lgs may be required for efficient Arm-mediated activation of Wg targets, but some activation may also occur in its absence. Consistent with this latter view, we have observed that animals lacking maternal and zygotic *lgs* product exhibit phenotypes equivalent to animals in which the sole source of Arm is the D164A transgene, yet neither of the two phenotypes are quite as severe as that of *wg*-null mutants.

### Possible relevance for human cancer

The Wnt pathway is highly conserved between *Drosophila* and vertebrates. The human homologues of Lgs (LGS1/BCL9) and Pygo (PYGO1 and PYGO2) can rescue *lgs* and *pygo* mutant flies, respectively (Kramps et al., 2002). This suggests that these proteins have the same function in vertebrates and in *Drosophila*. It is possible therefore, that our *in vivo* data can be extrapolated to Wnt signalling in mammals.

Mutations in APC occur in more than 80% of inherited and sporadic colorectal cancers (Kinzler and Vogelstein, 1996). These mutations lead to accumulation of free  $\beta$ -catenin and as a result to overexpression of Wnt target genes. A chemical compound that interferes with the formation of the nuclear TCF/ $\beta$ -catenin/Lgs/Pygo complex should in theory halt the progression of cancer. Such an anti-cancer drug must be highly specific though, as it should only disrupt the nuclear  $\beta$ -catenin complex, but neither the cytoplasmic  $\beta$ -catenin/APC/Axin complex nor the  $\beta$ -catenin/E-cadherin complex at the cell membrane. APC, Axin and E-cadherin functions should not be compromised, as all three of them have tumour suppressor roles (reviewed by Giles et al., 2003). This is not the case, however, for TCF and Lgs. Crystal structure data indicates that APC, Axin, E-cadherin and TCF4 partly use of the same contact sites of  $\beta$ -catenin for their binding (Eklof Spink et al., 2001; Graham et al., 2000; Graham et al., 2001; Huber and Weis, 2001; Xing et al., 2003). Therefore, designing an inhibitor that specifically disrupts the  $\beta$ -catenin/TCF interaction is a difficult task (Daniels et al., 2001; Lepourcelet et al., 2004). On the contrary, our mapping and specificity results indicate that the  $\beta$ -catenin/Lgs interaction site could be targeted without interfering with the binding of  $\beta$ -catenin to

APC and E-cadherin. Moreover, our analysis shows that genetic disruption of the Arm/Lgs interaction leads to severely reduced Wg signalling, suggesting that the protein-protein interaction between  $\beta$ -catenin and Lgs may provide an attractive target for therapeutic intervention.

We thank W. Birchmeier, R. Kemler and J. P. von Kries for plasmids; I. Duncan and T. Uemura for antibodies; M. Peifer for the *arm<sup>2a9</sup>* allele; A. Erkner, D. Frey, T. Kramps and D. Nellen for help; and G. Lettre as well as members of our laboratory for comments on the manuscript. This project was supported by the Swiss National Science Foundation and the Kanton of Zürich.

### References

- Aberle, H., Butz, S., Stappert, J., Weissig, H., Kemler, R. and Hoschuetzky, H. (1994). Assembly of the cadherin-catenin complex *in vitro* with recombinant proteins. *J. Cell. Sci.* **107**, 3655-3663.
- Bartel, P. L. and Fields, S. (1997). In *The Yeast Two-hybrid System*, Chapter 3. New York, NY: Oxford University Press.
- Basler, K. and Struhl, G. (1994). Compartment boundaries and the control of *Drosophila* limb patterning by hedgehog protein. *Nature* **368**, 208-214.
- Behrens, J., von Kries, J. P., Kuhl, M., Bruhn, L., Wedlich, D., Grosschedl, R. and Birchmeier, W. (1996). Functional interaction of beta-catenin with the transcription factor LEF-1. *Nature* **382**, 638-642.
- Bejsovec, A. and Wieschaus, E. (1993). Segment polarity gene interaction modulate epidermal patterning in *Drosophila* embryos. *Development* **119**, 501-517.
- Belenkaya, T. Y., Han, C., Standley, H. J., Lin, X., Houston, D. W., Heasman, J. and Lin, X. (2002). Pygopus encodes a nuclear protein essential for wingless/Wnt signaling. *Development* **129**, 4089-4101.
- Bronner, G., Chu-LaGriff, Q., Doe, C. Q., Cohen, B., Weigel, D., Taubert, H. and Jackle, H. (1994). Sp1/egr-like zinc-finger protein required for endoderm specification and germ-layer formation in *Drosophila*. *Nature* **369**, 664-668.
- Brunner, E., Peter, O., Schweizer, L. and Basler, K. (1997). Pangolin encodes a Lef-1 homologue that acts downstream of Armadillo to transduce the Wingless signal in *Drosophila*. *Nature* **385**, 829-833.
- Clontech (2001). *Yeast Protocols Handbook*. Palo Alto, CA: Clontech Laboratories.
- Dahmann, C. and Basler, K. (2000). Opposing transcriptional outputs of Hedgehog signaling and engrailed control compartmental cell sorting at the *Drosophila* A/P boundary. *Cell* **100**, 411-422.
- Daniels, D. L., Eklof Spink, E. and Weis, W. I. (2001). beta-catenin: molecular plasticity and drug design. *Trends Biochem. Sci.* **26**, 672-678.
- Diaz-Benjumea, F. J. and Cohen, S. M. (1995). Serrate signals through Notch to establish a Wingless-dependent organizer at the dorsal/ventral compartment boundary of the *Drosophila* wing. *Development* **121**, 4215-4225.
- Eklof Spink, K., Fridman, S. G. and Weis, W. I. (2001). Molecular mechanisms of beta-catenin recognition by adenomatous polyposis coli revealed by the structure of an APC-beta-catenin complex. *EMBO J.* **20**, 6203-6212.
- Ferlay, J., Bray, F., Pisani, P. and Parkin, D. M. (2001). *GLOBOCAN 2000: Cancer Incidence, Mortality and Prevalence Worldwide*, Version 1.0. IARC CancerBase No. 5. Lyon, France: IARC Press.
- Giles, R. H., van Es, J. H. and Clevers, H. (2003). Caught up in a Wnt storm: Wnt signaling in cancer. *Biochim. Biophys. Acta* **1653**, 1-24.
- Graham, T. A., Weaver, C., Mao, F., Kimelman, D. and Xu, W. (2000). Crystal structure of a beta-catenin/Tcf complex. *Cell* **103**, 885-896.
- Graham, T. A., Ferkey, D. M., Mao, F., Kimelman, D. and Xu, W. (2001). Tcf4 can specifically recognize beta-catenin using alternative conformations. *Nat. Struct. Biol.* **8**, 1048-1052.
- He, T. C., Sparks, A. B., Rago, C., Hermeking, H., Zawel, L., da Costa, L. T., Morin, P. J., Vogelstein, B. and Kinzler, K. W. (1998). Identification of c-MYC as a target of the APC pathway. *Science* **281**, 1509-1512.
- Huber, A. H. and Weis, W. I. (2001). The structure of the beta-catenin/E-cadherin complex and the molecular basis of diverse ligand recognition by beta-catenin. *Cell* **105**, 391-402.
- Huber, A. H., Nelson, W. J. and Weis, W. I. (1997). Three-dimensional structure of the armadillo repeat region of beta-catenin. *Cell* **90**, 871-882.
- Hulsken, J., Birchmeier, W. and Behrens, J. (1994). E-cadherin and APC

- compete for the interaction with beta-catenin and the cytoskeleton. *J. Cell Biol.* **127**, 2061-2069.
- Kinzler, K. W. and Vogelstein, B.** (1996). Lessons from hereditary colorectal cancer. *Cell* **87**, 159-170.
- Korinek, V., Barker, N., Morin, P. J., van Wichen, D., de Weger, R., Kinzler, K. W., Vogelstein, B. and Clevers, H.** (1997). Constitutive transcriptional activation by a beta-catenin-Tcf complex in APC  $-/-$  colon carcinoma. *Science* **275**, 1784-1787.
- Kramps, T., Peter, O., Brunner, E., Nellen, D., Froesch, B., Chatterjee, S., Murone, M., Zullig, S. and Basler, K.** (2002). Wnt/wingless signaling requires BCL9/legless-mediated recruitment of pygopus to the nuclear beta-catenin-TCF complex. *Cell* **109**, 47-60.
- Lepourcelet, M., Chen, Y. N., France, D. S., Wang, H., Crews, P., Petersen, F., Bruseo, C., Wood, A. W. and Shivdasani, R. A.** (2004). Small-molecule antagonists of the oncogenic Tcf/beta-catenin protein complex. *Cancer Cell* **5**, 91-102.
- Miller, J. R. and Moon, R. T.** (1997). Analysis of the signaling activities of localization mutants of beta-catenin during axis specification in *Xenopus*. *J. Cell Biol.* **139**, 229-243.
- Morin, P. J., Sparks, A. B., Korinek, V., Barker, N., Clevers, H., Vogelstein, B. and Kinzler, K. W.** (1997). Activation of beta-catenin-Tcf signaling in colon cancer by mutations in beta-catenin or APC. *Science* **275**, 1787-1790.
- Nüsslein-Volhard, C., Wieschaus, E. and Kludling, H.** (1984). Mutations affecting the pattern of the larval cuticle in *Drosophila melanogaster*. *Roux's Arch. Dev. Biol.* **193**, 267-282.
- Omer, C. A., Miller, P. J., Diehl, R. E. and Kral, A. M.** (1999). Identification of Tcf4 residues involved in high-affinity beta-catenin binding. *Biochem. Biophys. Res. Commun.* **256**, 584-590.
- Pai, L. M., Orsulic, S., Bejsovec, A. and Peifer, M.** (1997). Negative regulation of Armadillo, a Wingless effector in *Drosophila*. *Development* **124**, 2255-2266.
- Parker, D. S., Jemison, J. and Cadigan, K. M.** (2002). Pygopus, a nuclear PHD-finger protein required for Wingless signaling in *Drosophila*. *Development* **129**, 2565-2576.
- Peifer, M. and Wieschaus, E.** (1990). The segment polarity gene armadillo encodes a functionally modular protein that is the *Drosophila* homolog of human plakoglobin. *Cell* **63**, 1167-1178.
- Peifer, M., Orsulic, S., Sweeton, D. and Wieschaus, E.** (1993). A role for the *Drosophila* segment polarity gene armadillo in cell adhesion and cytoskeletal integrity during oogenesis. *Development* **118**, 1191-1207.
- Peifer, M., Berg, S. and Reynolds, A. B.** (1994). A repeating amino acid motif shared by proteins with diverse cellular roles. *Cell* **76**, 789-791.
- Pokutta, S. and Weis, W. I.** (2002). The cytoplasmic face of cell contact sites. *Curr. Opin. Struct. Biol.* **12**, 255-262.
- Riese, J., Yu, X., Munsterlyn, A., Eresh, S., Hsu, S. C., Grosschedl, R. and Bienz, M.** (1997). LEF-1, a nuclear factor coordinating signaling inputs from wingless and decapentaplegic. *Cell* **88**, 777-787.
- Shtutman, M., Zhurinsky, J., Simcha, I., Albanese, C., D'Amico, M., Pestell, R. and Ben-Ze'ev, A.** (1999). The cyclin D1 gene is a target of the beta-catenin/LEF-1 pathway. *Proc. Natl. Acad. Sci. USA* **96**, 5522-5527.
- Sparks, A. B., Morin, P. J., Vogelstein, B. and Kinzler, K. W.** (1998). Mutational analysis of the APC/beta-catenin/Tcf pathway in colorectal cancer. *Cancer Res.* **58**, 1509-1512.
- Thompson, B., Townsley, F., Rosin-Arbesfeld, R., Musisi, H. and Bienz, M.** (2002). A new nuclear component of the Wnt signalling pathway. *Nat. Cell Biol.* **4**, 367-373.
- Tolwinski, N. S. and Wieschaus, E.** (2001). Armadillo nuclear import is regulated by cytoplasmic anchor Axin and nuclear anchor dTCF/Pan. *Development* **128**, 2107-2117.
- Tolwinski, N. S. and Wieschaus, E.** (2004). A Nuclear Function for Armadillo/beta-Catenin. *PLoS Biol.* **2**, 1-8.
- Uemura, T., Oda, H., Kraut, R., Hayashi, S., Kotaoka, Y. and Takeichi, M.** (1996). Zygotic *Drosophila* E-cadherin expression is required for processes of dynamic epithelial cell rearrangement in the *Drosophila* embryo. *Genes Dev.* **10**, 659-671.
- van de Wetering, M., Cavallo, R., Dooijes, D., van Beest, M., van Es, J., Loureiro, J., Ypma, A., Hursh, D., Jones, T., Bejsovec, A. et al.** (1997). Armadillo coactivates transcription driven by the product of the *Drosophila* segment polarity gene dTCF. *Cell* **88**, 789-799.
- van de Wetering, M., Sancho, E., Verweij, C., de Lau, W., Oving, I., Hurlstone, A., van der Horn, K., Batlle, E., Coudreuse, D., Haramis, A. P. et al.** (2002). The beta-catenin/TCF-4 complex imposes a crypt progenitor phenotype on colorectal cancer cells. *Cell* **111**, 241-250.
- von Kries, J. P., Winbeck, G., Asbrand, C., Schwarz-Romond, T., Sochnikova, N., Dell'Oro, A., Behrens, J. and Birchmeier, W.** (2000). Hot spots in beta-catenin for interactions with LEF-1, conductin and APC. *Nat. Struct. Biol.* **7**, 800-807.
- Wodarz, A. and Nusse, R.** (1998). Mechanisms of Wnt signaling in development. *Annu. Rev. Cell Dev. Biol.* **14**, 59-88.
- Wodarz, A., Hinz, U., Engelbert, M. and Knust, E.** (1995). Expression of crumbs confers apical character on plasma membrane domain of ectodermal epithelia of *Drosophila*. *Cell* **82**, 67-76.
- Xing, Y., Clements, W. K., Kimelman, D. and Xu, W.** (2003). Crystal structure of a beta-catenin/axin complex suggests a mechanism for the beta-catenin destruction complex. *Genes Dev.* **17**, 2753-2764.
- Zecca, M., Basler, K. and Struhl, G.** (1996). Direct and long-range action of a wingless morphogen gradient. *Cell* **87**, 833-844.
